# Supplementary material
Source: Springer Nature journal article supplement (https://www.springermedizin.de/resource/supplementary/12884_2013_878_MOESM2_ESM.pdf/9458386)
Supplement: MOESM2 [file 9458386]

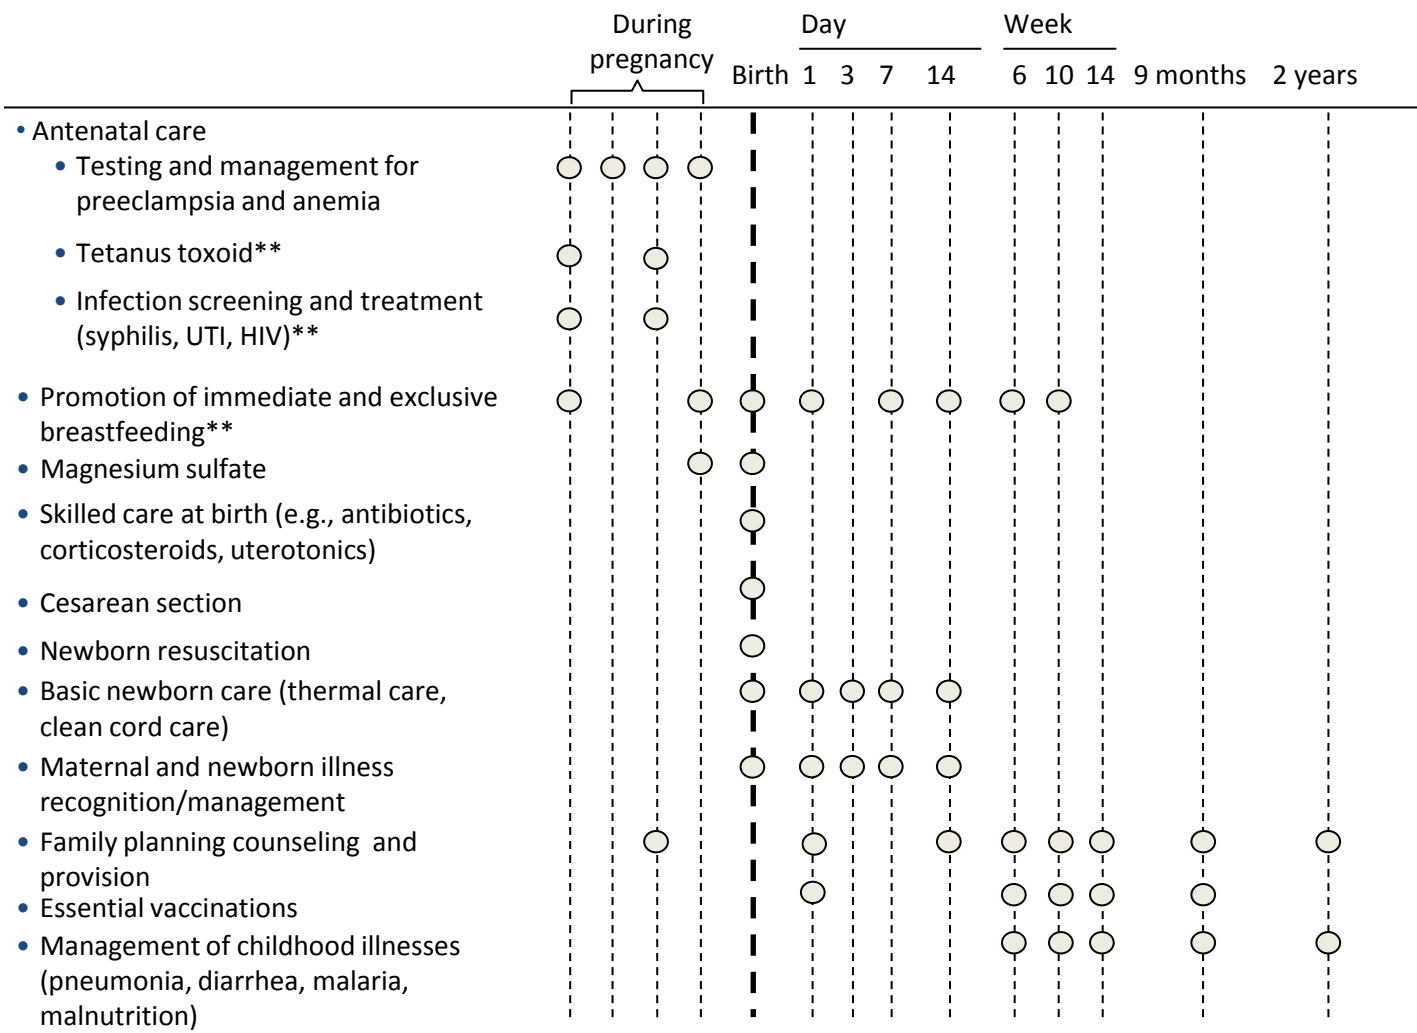

Key:

— = interaction

○ = delivery of intervention

\* These example interventions are a subset of the full set of 30 needed interventions between pregnancy and 28 days of birth (excludes unpredictable curative interactions)

\*\* Can also occur during different visits throughout antenatal period, and promotion of breastfeeding can occur at any interaction
